# Supplementary material for: Mixing scheme of an aqueous solution of tetrabutylphosphonium trifluoroacetate in the water-rich region
Source: Royal Society of Chemistry journal article supplement (doi:10.1039/c7cp02997g), 2017-01-01
Supplement: c7cp02997g1.pdf [file c7cp02997g1.pdf]

## Supplementary information for:-

### “Mixing scheme of the aqueous solution of tetrabutylphosphonium trifluoroacetate in the water-rich region”

Ayako Nitta,<sup>1</sup> Takeshi Morita,<sup>1</sup> Keiko Nishikawa,<sup>1</sup> and Yoshikata Koga<sup>2\*</sup>

1: *Division of Nano Science, Graduate School of Advanced Integration Science, Chiba University, Chiba 263-8522, Japan*

2: *Department of Chemistry, The University of British Columbia, Vancouver, BC, V6T 1Z1, Canada*

#### 1. Calculation of the apparent excess partial molar volumes

For binary systems of ionic liquid (IL) and water, the molar volume are divided into the ideal part,  $V_m^{ideal}$ , and the excess part,  $V_m^E$ , as,

$$V_m = V_m^{ideal} + V_m^E = \{V_{IL}^*x_{IL} + V_W^*(1 - x_{IL})\} + V_m^E. \quad (S-1)$$

$V_m^{ideal}$  can be calculated using the molar volumes of pure liquid IL,  $V_{IL}^*$ , and water,  $V_W^*$ , and the mole fraction of IL,  $x_{IL}$ , and it is linear to  $x_{IL}$ .

However, for the aqueous solution of  $[P_{4,4,4,4}]\text{CF}_3\text{COO}$ , pure  $[P_{4,4,4,4}]\text{CF}_3\text{COO}$  is a solid at room temperature and it is not possible to obtain  $V_{IL}^*$ . We, therefore, define the “apparent” ideal molar volume of the present system,  $V_{m,ap}^{ideal}$ , using the data set at  $x_{IL}=0.000$  and at 0.079, assuming that  $V_{m,ap}^{ideal}$  passes through the  $V_m$  value at the uppermost

data point,  $x_{IL} = 0.079$ . Hence,

$$V_{m,ap}^{ideal}(x_{IL}) = x_{IL} \cdot \frac{V_{m(x_{IL}=0.079)} - V_W^*}{0.079} + V_W^*, \quad (S-2)$$

and the “apparent” molar volume of “pure liquid [P<sub>4,4,4,4</sub>]CF<sub>3</sub>COO” at  $x_{IL} = 1$  is expressed as,

$$V_{IL,ap}^* = \frac{V_{m(x_{IL}=0.079)} - V_W^*}{0.079} + V_W^*. \quad (S-3)$$

According to the equation (S-1), the “apparent” excess molar volume is then written as,

$$V_{m,ap}^E(x_{IL}) = V_m(x_{IL}) - V_{m,ap}^{ideal}(x_{IL}). \quad (S-4)$$

Figure S1-1 shows the apparent excess molar volumes,  $V_{m,ap}^E$ , at 25 °C. In this concentration region  $V_{m,ap}^E$  shows negative value and concave downward. The smooth curve was drawn through all the data points using a flexible ruler as the solid line in the figure.

Then the apparent excess partial molar volume of IL,  $V_{IL,ap}^E$ , is calculated as,

$$V_{IL,ap}^E = (1 - x_{IL}) \left( \frac{\partial V_{m,ap}^E}{\partial x_{IL}} \right) + V_{m,ap}^E. \quad (S-5)$$

We differentiated  $V_{m,ap}^E$  graphically using the smooth curve by reading the values off the smooth curve at every 0.001 mole fraction of [P<sub>4,4,4,4</sub>]CF<sub>3</sub>COO and calculate partial molar volume of [P<sub>4,4,4,4</sub>]CF<sub>3</sub>COO as,

$$V_{IL,ap}^E = (1 - x_{IL}) \left( \frac{\Delta V_{m,ap}^E}{\Delta x_{IL}} \right) + V_{m,ap}^E. \quad (S-6)$$

$\Delta V_{m,ap}^E$  indicates the amount of change of  $V_{m,ap}^E$  at  $\Delta x_{IL} = 0.001$  intervals. The apparent

excess partial molar volume of water,  $V_{W,ap}^E$ , is calculated by the same manner.

## 2. Graphical differentiation using a flexible ruler

To obtain the next higher order derivative quantities, graphical differentiation using a flexible ruler was applied on the measured data as shown in Figure S1-1. The advantage of graphical differentiation for the differential thermodynamics in dilute region was discussed extensively elsewhere.<sup>1-3</sup> The fact that B-spline method is not able to reflect inflection points of data has been described.<sup>2,3</sup>

Conventionally, such a fitting function as the Redlich-Kister polynomial<sup>4</sup> is used to raise the order of derivative by a step. It is known as one of the popular fitting functions of excess quantities for binary systems written as,

$$V_m^E(x) = x(1-x) \sum_{i=0}^n A_i (2x-1)^i, \quad (\text{S-7})$$

where  $x$  is mole fraction of a solute,  $A_i$ 's are the fitted polynomial coefficients and  $n$  is its degree. Figure S1-2 shows the obtained fitting curves by a flexible ruler (dotted line) and the Redlich-Kister polynomial of  $n=2$  (solid line). On increasing to  $n=3$ , the fitting curve became wavy, and the case of  $n=2$  seems most appropriate. As shown in Figure S1-2, the inflection point apparent around at  $x_{IL} = 0.03$  along the dotted curve is not reproduced on the solid curve obtained by latter. Thus, equation (S-7) is not suitable for the present mole fraction range.

Numerical differentiation is another method which reflects the experimental fact perfectly and model-free. For this purpose, the quality of all the data points with small increments ought to be very high with at the least 4 significant figures. In the previous study<sup>5</sup>, we successfully obtained the third derivative quantities with at least 3 significant

figures by numerical differentiation. When the data contain a sporadic error as for the present case apparent at about  $x_{\text{IL}} = 0.055$  in Fig. S1-1, the numerical method cannot be used, otherwise devastating error will be introduced. In such cases, we have to use human judgement and draw a smooth curve through all the data points by the aid of a flexible ruler.

### *References*

- 1 M. T. Parsons, P. Westh, J. V Davies, C. Trandum, E. C. H. To, W. M. Chiang, E. G. M. Yee and Y. Koga, *J. Solution Chem.*, 2001, **30**, 1007–1028.
- 2 Y. Koga, H. Katayanagi, J. V. Davies, H. Kato, K. Nishikawa and P. Westh, *Bull. Chem. Soc. Jpn.*, 2006, **79**, 1347–1354.
- 3 Y. Koga, *Solution Thermodynamics and its Application to Aqueous Solutions, 1st Edition A Differential Approach*, Elsevier Science, 2<sup>nd</sup> Ed., Amsterdam, 2017, Appendix A pp. 395–396.
- 4 O. Redlich and A. T. Kister, *Ind. Eng. Chem.*, 1948, **40**, 345–348.
- 5 T. Morita, K. Miki, A. Nitta, H. Ohgi and P. Westh, *Phys. Chem. Chem. Phys.*, 2015, **17**, 22170–22178.

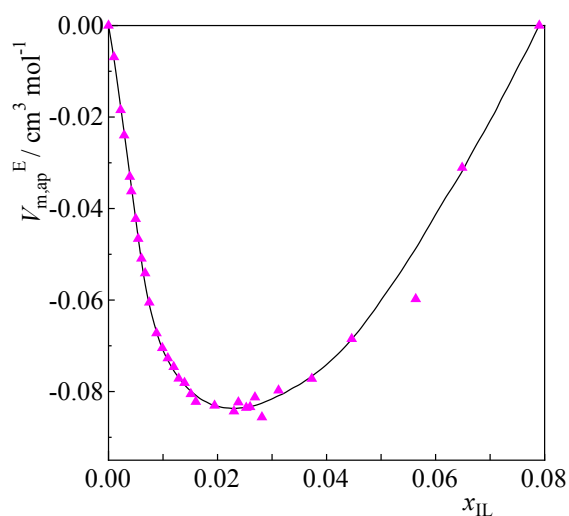

Figure S1-1 The apparent excess molar volume of the aqueous solution of  $[P_{4,4,4,4}]CF_3COO$ ,  $V_{m,ap}^E$ , at 25 °C against  $x_{IL}$ . The uncertainty is estimated as  $\pm 0.002 \text{ cm}^3 \text{ mol}^{-1}$ . There is a sporadically bad point at about  $x_{IL} = 0.06$ , which was ignored. The solid curve is a smooth curve drawn with a flexible ruler.

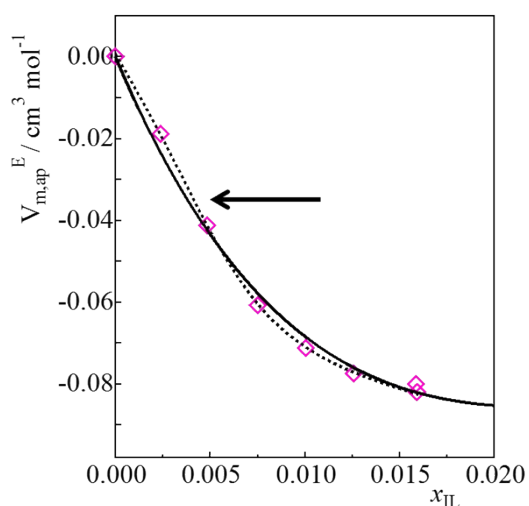

Figure S1-2 The smooth curves fitted on the plots of the measured apparent excess

partial molar volume,  $V_{m,ap}^E$ , at 25 °C. The uncertainty for these data points is estimated as  $\pm 0.002 \text{ cm}^3 \text{ mol}^{-1}$ . The solid curve was obtained by Redlich-Kister polynomial with  $n=2$  and the dotted line was drawn manually using a flexible ruler.
