# Supplementary material for: Mixing scheme of an aqueous solution of tetrabutylphosphonium trifluoroacetate in the water-rich region
Source: Royal Society of Chemistry journal article supplement (doi:10.1039/c7cp02997g), 2017-01-01
Supplement: c7cp02997g2.xlsx [file c7cp02997g2.xlsx]

## Sheet: enthalpy
Supplementry information S2
Raw data for "Mixing scheme of the aqueous solution of tetrabutylphosphonium trifluoroacetate in the water-rich region.
A. Nitta et al.
x_IL	h
	kJ mol-1
0.00172097	-26.0405
0.00218885	-19.6655
0.00264696	-25.0579
0.00309563	-23.7271
0.00353514	-22.794
0.00449763	-20.2316
0.00498086	-17.7007
0.005337	-15.0184
0.00557035	-14.3622
0.00616042	-13.1638
0.00662487	-11.4058
0.00707865	-9.90199
0.00752212	-8.15925
0.00795564	-7.46426
0.00858797	-6.13715
0.00899802	-5.517
0.00966185	-4.44926
0.010113	-4.09074
0.010553	-3.72273
0.0109825	-3.34581
0.0114017	-3.15333
0.0120121	-2.85578
0.0124073	-2.59339
0.0130452	-2.07919
0.0134778	-2.01388
0.0138992	-1.98766
0.0143099	-1.80912
0.0147102	-1.74231
0.0150049	-1.69077
0.0152922	-1.57609
0.0161228	-1.52262
0.0169378	-1.40268
0.0177098	-1.26972

## Sheet: volume
x_IL	density / g cm-3				molar mass
	20 ºC	25 ºC	28 ºC		IL	372.46
0	0.9983	0.9971	0.9963		water	18.02
0.00100358	0.9998	0.9985	0.9977
0.00221845	1.0016	1.0003	0.9994
0.00287157	1.0025	1.0012	1.0002
0.00390469	1.0041	1.0026	1.0016
0.0041754	1.0044	1.003	1.0019
0.00498642	1.0056	1.004	1.003
0.00544328	1.0062	1.0046	1.0035
0.00603898	1.007	1.0053	1.0042
0.00672132	1.0078	1.006	1.0048
0.00748246	1.0088	1.0069	1.0057
0.00880316	1.0102	1.0082	1.0069
0.00985931	1.0112	1.0091	1.0077
0.0108783	1.0122	1.0099	1.0085
0.0119593	1.0131	1.0107	1.0093
0.0128763	1.0138	1.0114	1.0099
0.0139413	1.0146	1.0121	1.0106
0.0151021	1.0154	1.0129	1.0113
0.0160134	1.0161	1.0135	1.0118
0.0194549	1.0182	1.0154	1.0136
0.0230116	1.0201	1.0172	1.0153
0.0238247	1.0205	1.0175	1.0157
0.0252744	1.0212	1.0182	1.0163
0.0259731	1.0215	1.0185	1.0166
0.0268566	1.0219	1.0188	1.0169
0.0281394	1.0226	1.0195	1.0176
0.0311946	1.0237	1.0205	1.0185
0.0372918	1.0259	1.0226	1.0205
0.0446083	1.028	1.0246	1.0225
0.056365	1.031	1.0274	1.0252
0.0648708	1.0322	1.0285	1.0263
0.0790209	1.0341	1.0304	1.0281
